# Supplementary material for: Copper(ii) induced oxidative modification and complexation of a schiff base ligand: synthesis, crystal structure, catalytic oxidation of aromatic hydrocarbons and DFT calculation
Source: Royal Society of Chemistry journal article supplement (doi:10.1039/c4ra06078d), 2014-01-01
Supplement: c4ra06078d1.pdf [file c4ra06078d1.pdf]

## Copper(II) induced oxidative modification and complexation of a Schiff base Ligand: synthesis, crystal structure, catalytic oxidation of aromatic hydrocarbons and DFT calculation†

Surajit Biswas<sup>a</sup>, Arpan Dutta<sup>a</sup>, Malay Dolai<sup>a</sup>, Mainak Debnath<sup>a</sup>, Atish Dipankar Jana<sup>b</sup> and Mahammad Ali<sup>a\*</sup>

<sup>a</sup>Department of Chemistry, Jadavpur University, Kolkata 700 032, India. E-mail: [mali@chemistry.jdvu.ac.in](mailto:mali@chemistry.jdvu.ac.in)

<sup>b</sup> Department of Physics, Behala College, Parnasree, Kolkata, 700 060, India

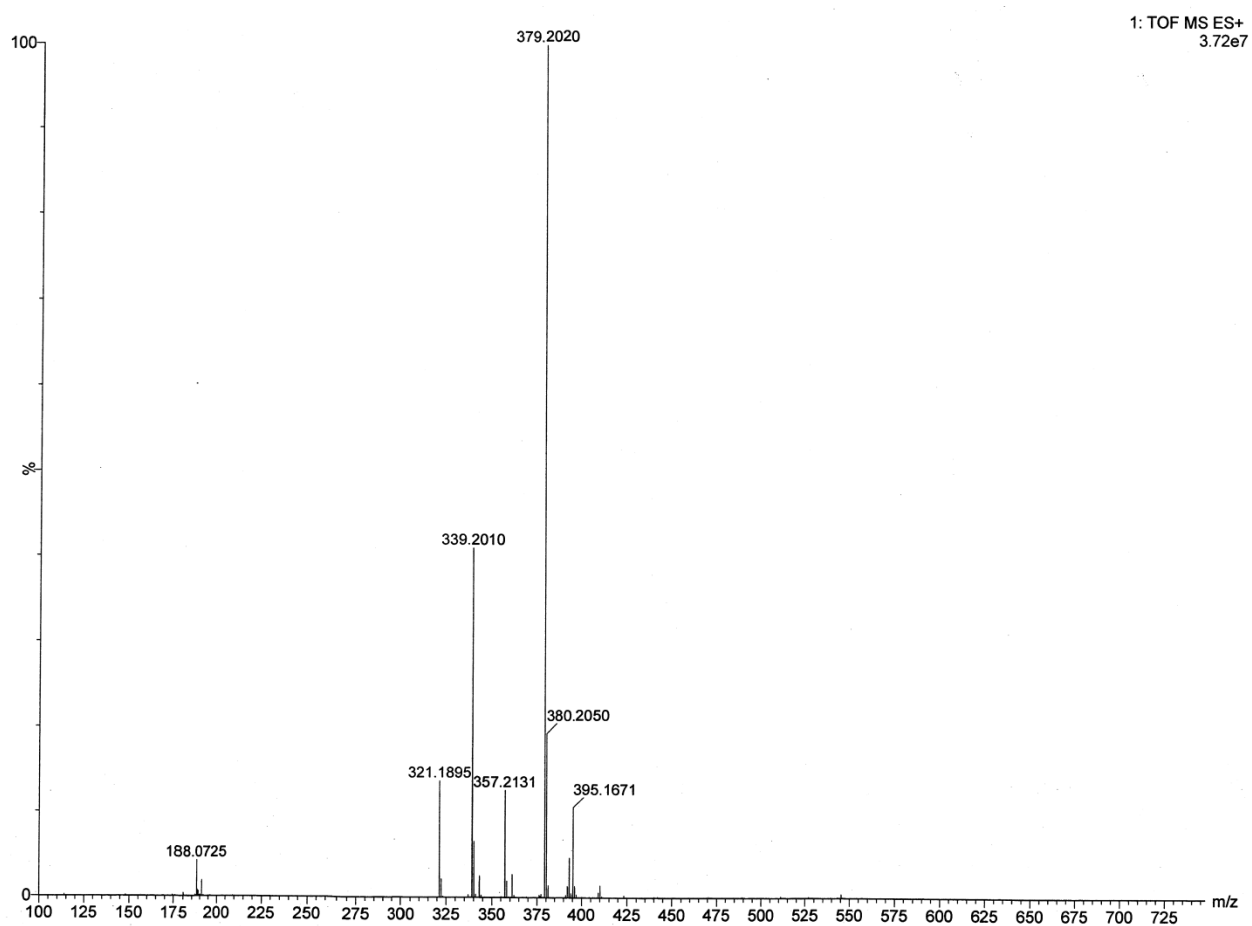

Fig.S1HRMS spectra of [H<sub>2</sub>L<sup>a</sup>].

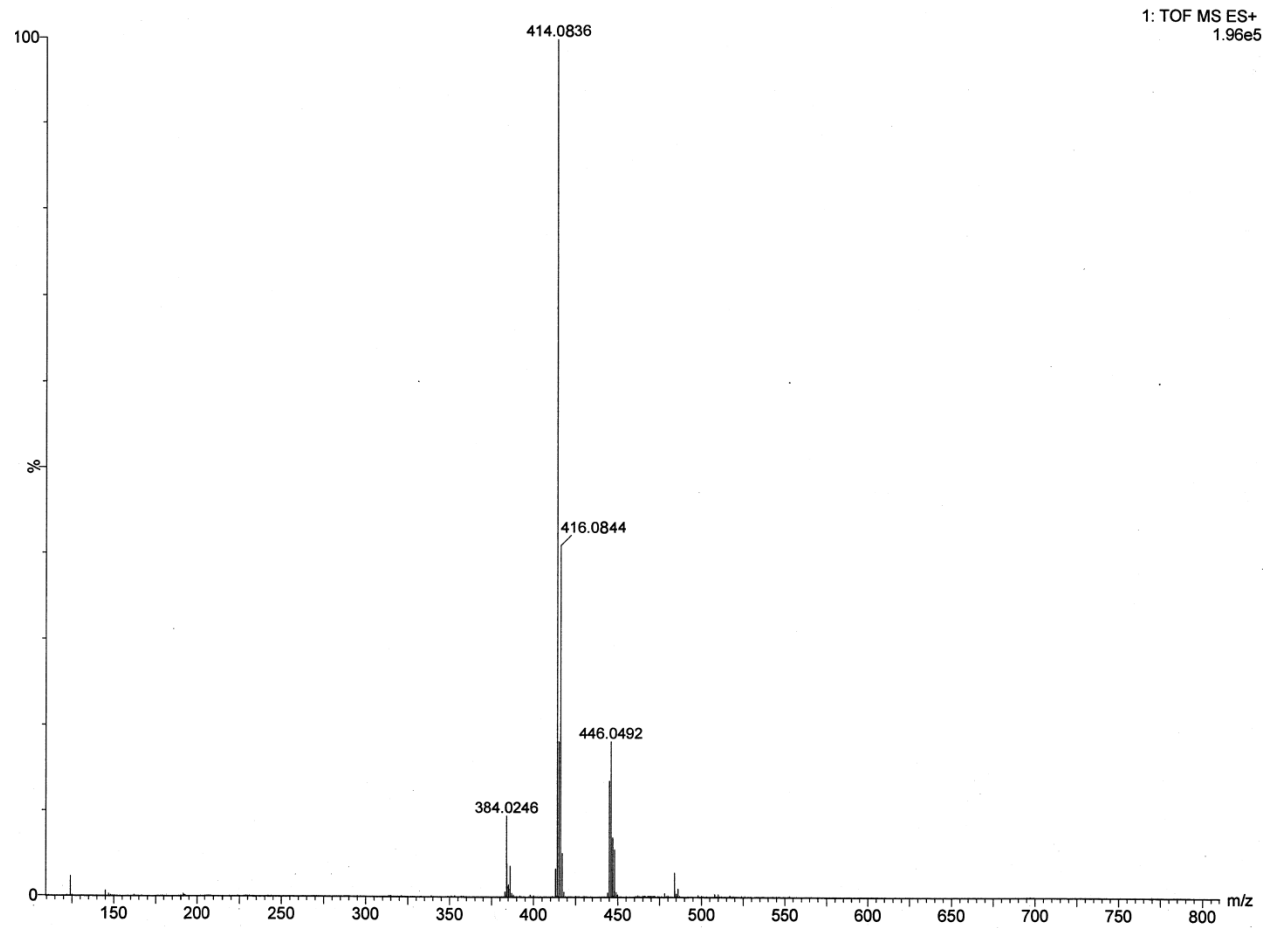

**Fig.S2** HRMS spectra of [Cu(L<sup>f</sup>)].

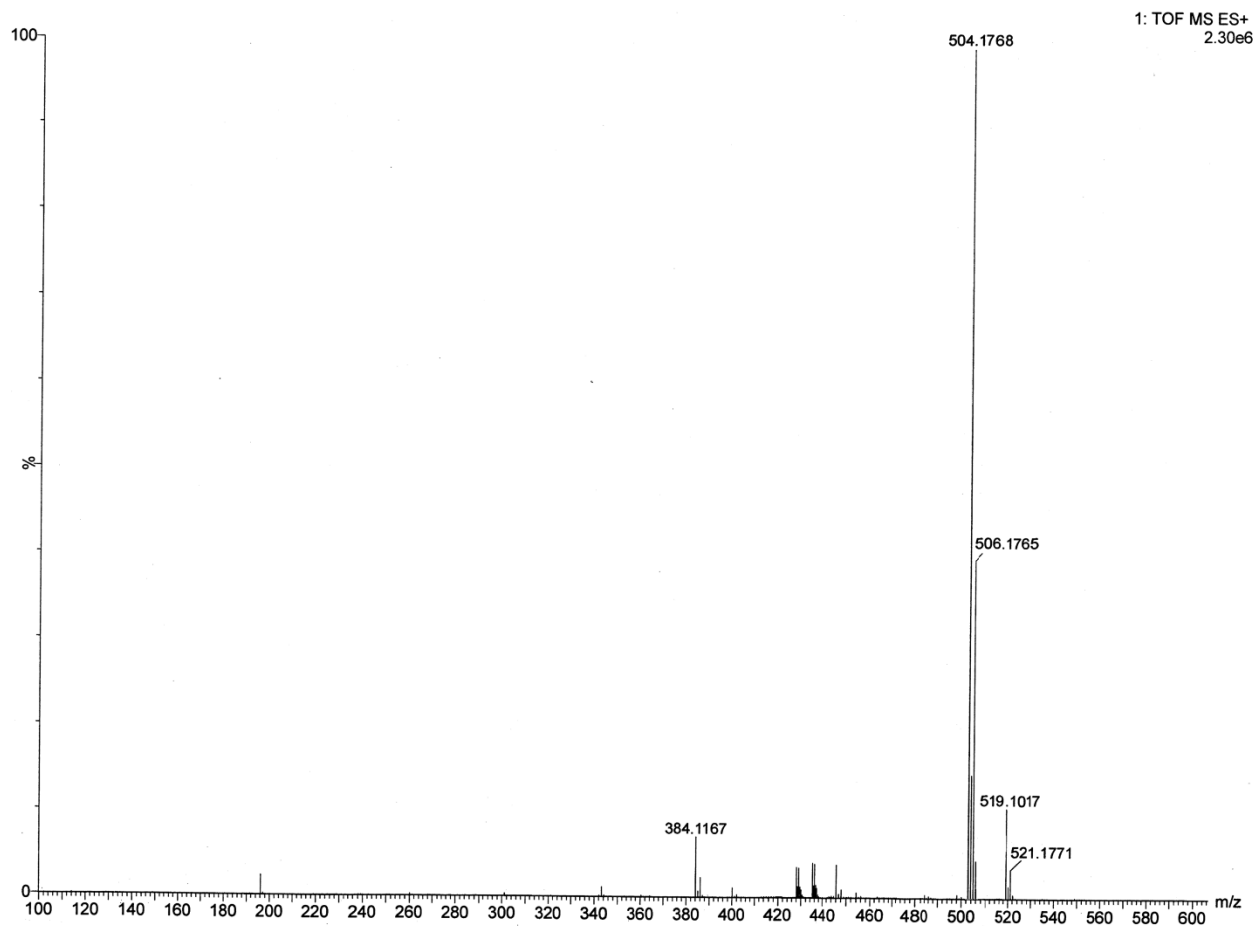

Fig.S3 HRMS spectra of [Cu(L<sup>8</sup>)].

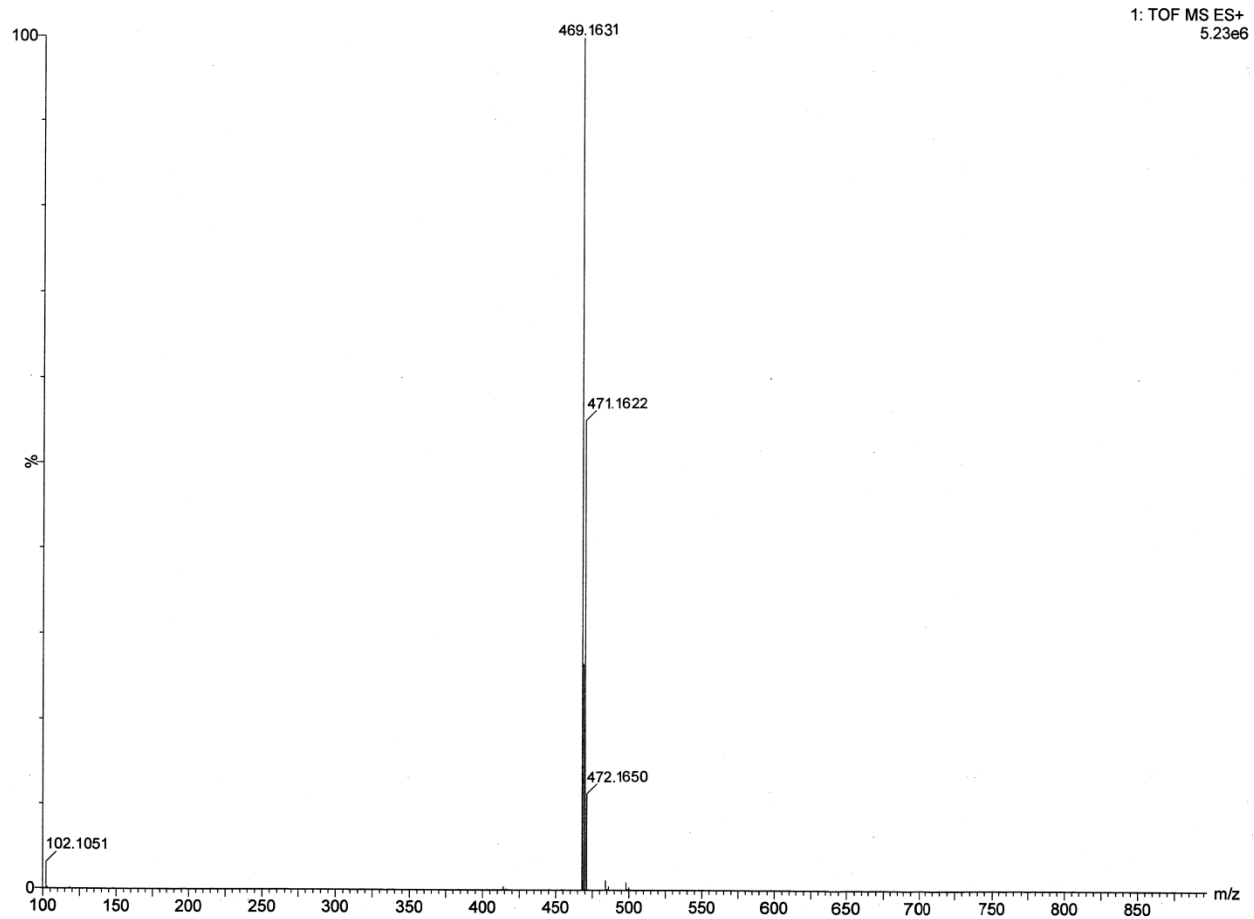

Fig. S4 HRMS spectra of [Cu(L<sup>h</sup>)].

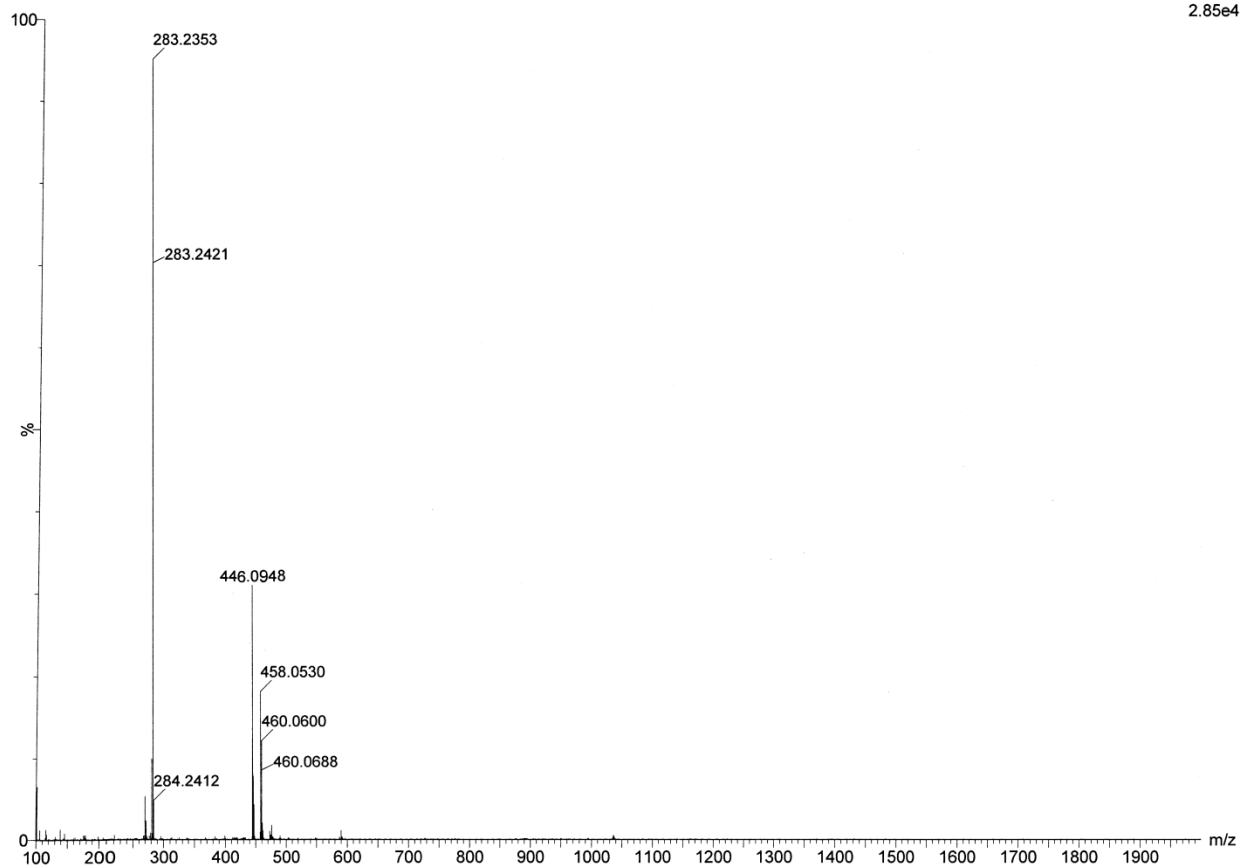

**Fig. S5**HRMS spectra of  $[\text{Cu}(\text{L}^f)(\text{OOH})]^-$  generated *in situ* by the reaction between  $[\text{Cu}(\text{L}^{2f})]$  and  $\text{H}_2\text{O}_2$  in presence of **1** and equivalent amount of TEA.



|  |  |     |                         |                            |                                                          |  |     |                 |
|--|--|-----|-------------------------|----------------------------|----------------------------------------------------------|--|-----|-----------------|
|  |  |     |                         |                            | 57<br>13<br>60<br>18                                     |  |     |                 |
|  |  | 500 | 3<br>6<br>9<br>12<br>24 | 22<br>40<br>59<br>73<br>83 | 17<br>05<br>32<br>08<br>48<br>11<br>59<br>14<br>62<br>21 |  | 287 | 0.107 ±<br>0.02 |

**Table S2.** Oxidation of *o*-xylene by complex **1**, catalyst = 0.055 mmol.

| Catalyst | Substrate                                                                          | n(H <sub>2</sub> O <sub>2</sub> )/n(Catalyst) | Reaction time (Hr.) | Conversion | Yield |       | Major product                                                                        | TON             | Rate constant (h <sup>-1</sup> ) |
|----------|------------------------------------------------------------------------------------|-----------------------------------------------|---------------------|------------|-------|-------|--------------------------------------------------------------------------------------|-----------------|----------------------------------|
|          |                                                                                    |                                               |                     |            | Major | Minor |                                                                                      |                 |                                  |
| <b>1</b> | 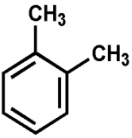 | 150                                           | 3                   | 17         | 14    | 03    |  | 236             |                                  |
|          |                                                                                    |                                               | 6                   | 31         | 26    | 05    |                                                                                      |                 |                                  |
|          |                                                                                    |                                               | 9                   | 50         | 41    | 09    |                                                                                      |                 |                                  |
|          |                                                                                    |                                               | 12                  | 65         | 52    | 13    |                                                                                      |                 |                                  |
|          |                                                                                    |                                               | 24                  | 71         | 55    | 16    |                                                                                      |                 |                                  |
|          |                                                                                    | 300                                           | 3                   | 19         | 15    | 04    |                                                                                      |                 |                                  |
|          |                                                                                    |                                               | 6                   | 35         | 28    | 07    |                                                                                      |                 |                                  |
|          |                                                                                    |                                               | 9                   | 54         | 44    | 10    |                                                                                      |                 |                                  |
|          |                                                                                    |                                               | 12                  | 68         | 53    | 15    |                                                                                      |                 |                                  |
|          |                                                                                    |                                               | 24                  | 76         | 57    | 19    |                                                                                      |                 |                                  |
|          |                                                                                    | 500                                           | 3                   | 22         | 16    | 06    |                                                                                      |                 |                                  |
|          |                                                                                    |                                               | 6                   | 39         | 31    | 08    |                                                                                      |                 |                                  |
| 9        | 56                                                                                 |                                               | 45                  | 11         |       |       |                                                                                      |                 |                                  |
| 12       | 72                                                                                 |                                               | 55                  | 17         |       |       |                                                                                      |                 |                                  |
| 24       | 80                                                                                 |                                               | 59                  | 21         |       |       |                                                                                      |                 |                                  |
|          |                                                                                    |                                               |                     |            |       |       | 280                                                                                  | 0.109 ±<br>0.02 |                                  |

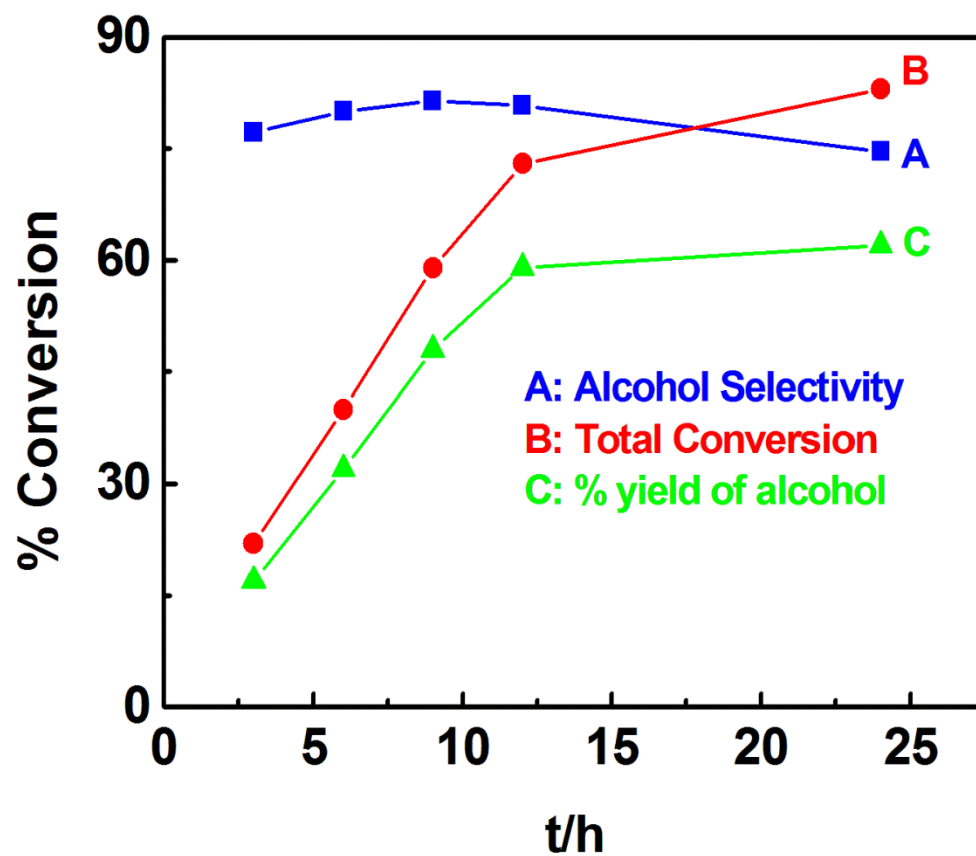

Fig. S7 Liquid phase partial oxidation of *p*-xylene by H<sub>2</sub>O<sub>2</sub> using complex **1** as catalysts.



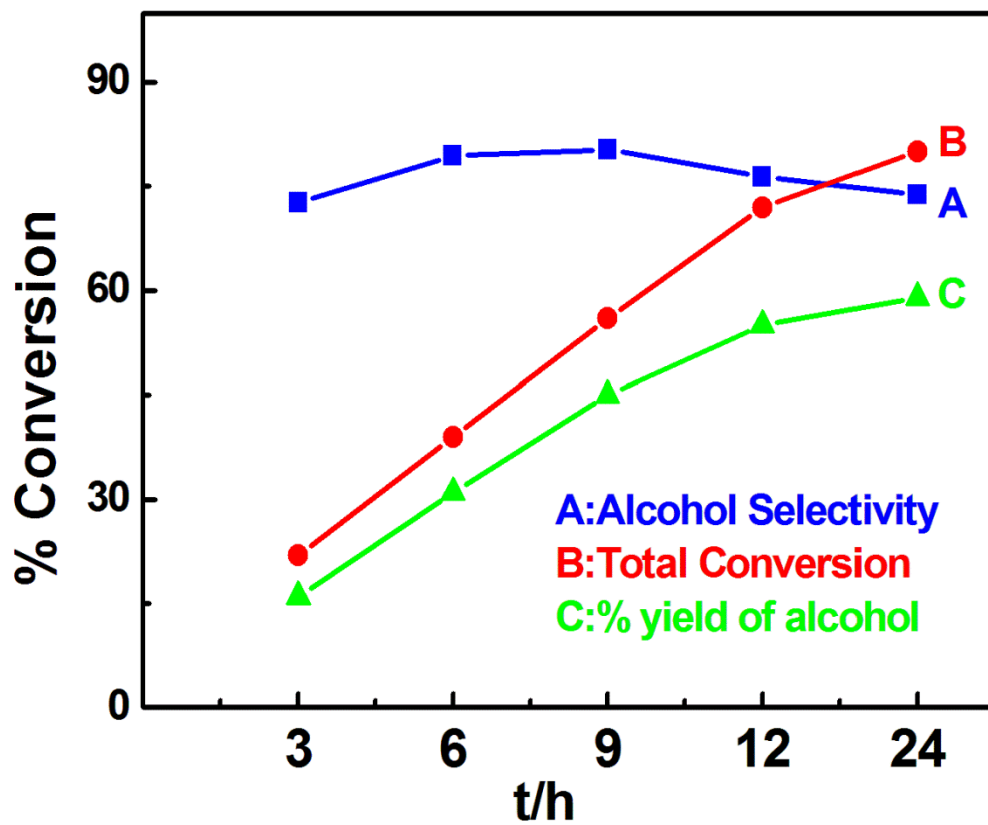

Fig. S8 Liquid phase partial oxidation of *o*-Xylene by H<sub>2</sub>O<sub>2</sub> using complex 1 as catalysts.

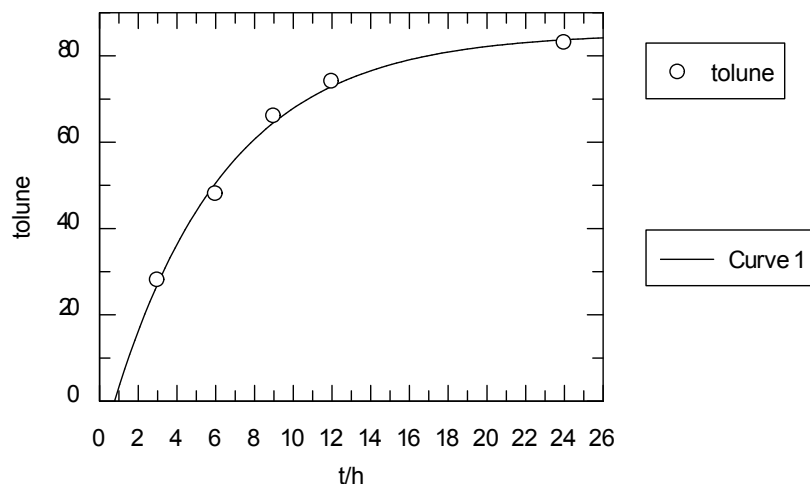

File : (untitled)  
 Thursday 17-04-14 12:30  
 $y = A+B*(1-\exp(-k*t))$   
 Simple weighting  
 Reduced Chi squared =  
 5.557

| Variable | Value        | Std. Err.   |
|----------|--------------|-------------|
| A        | -1.2081e+001 | 8.0725e+000 |
| B        | 9.7380e+001  | 7.0378e+000 |
| k        | 1.7195e-001  | 2.3630e-002 |

| t             | Y           |             |
|---------------|-------------|-------------|
| t/h           | toluene     | Calculated  |
| 1 3.0000e+000 | 2.8000e+001 | 2.7164e+001 |
| 2 6.0000e+000 | 4.8000e+001 | 5.0593e+001 |
| 3 9.0000e+000 | 6.6000e+001 | 6.4580e+001 |
| 4 1.2000e+001 | 7.4000e+001 | 7.2930e+001 |
| 5 2.4000e+001 | 8.3000e+001 | 8.3728e+001 |

**Fig. S9a** Evaluation of rate constant from the non-linear fit of % conversion of toluene with time in h using equation  $y = A*(1-\exp(-kt))$ .

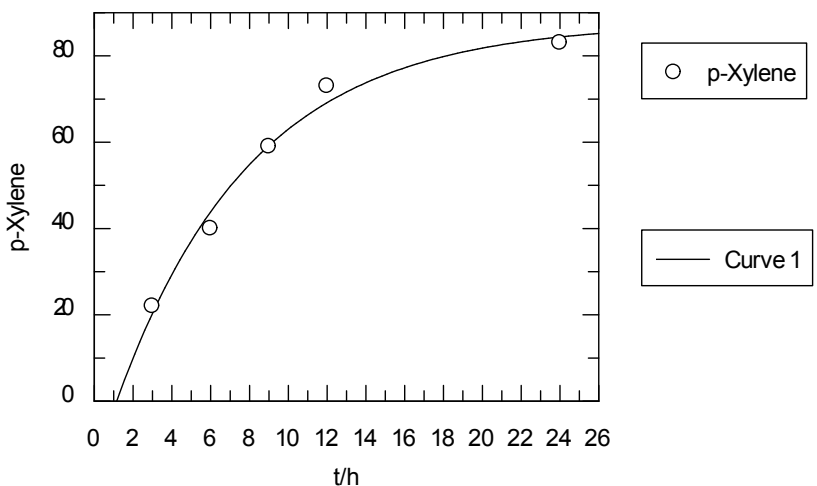

File : (untitled)  
 Thursday 17-04-14 12:29  
 $y = A+B*(1-\exp(-k*t))$   
 Simple weighting  
 Reduced Chi squared =  
 17.26

| Variable | Value        | Std. Err.   |
|----------|--------------|-------------|
| A        | -1.5803e+001 | 1.2053e+001 |
| B        | 1.0349e+002  | 1.0186e+001 |
| k        | 1.4334e-001  | 3.2589e-002 |

| t<br>t/h      | Y<br>p-Xylene | Calculated  |
|---------------|---------------|-------------|
| 1 3.0000e+000 | 2.2000e+001   | 2.0368e+001 |
| 2 6.0000e+000 | 4.0000e+001   | 4.3897e+001 |
| 3 9.0000e+000 | 5.9000e+001   | 5.9203e+001 |
| 4 1.2000e+001 | 7.3000e+001   | 6.9159e+001 |
| 5 2.4000e+001 | 8.3000e+001   | 8.4371e+001 |

**Fig. S9b** Evaluation of rate constant from the non-linear fit of % conversion of p-xylene with time in h using equation  $y = A*(1-\exp(-kt))$ .

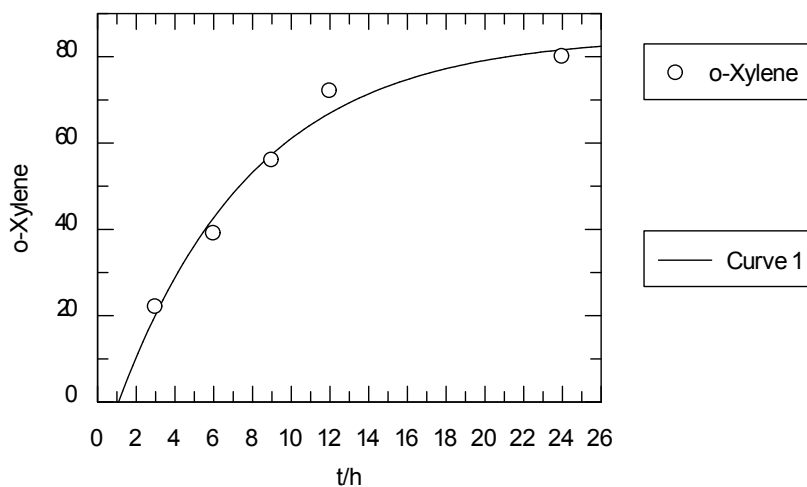

File : (untitled)  
 Thursday 17-04-14 12:31  
 $y = A+B*(1-\exp(-k*t))$   
 Simple weighting  
 Reduced Chi squared =  
 23.53

| Variable | Value        | Std. Err.   |
|----------|--------------|-------------|
| A        | -1.4193e+001 | 1.4030e+001 |
| B        | 9.9043e+001  | 1.1848e+001 |
| k        | 1.4258e-001  | 3.9619e-002 |

| t             | Y           |             |
|---------------|-------------|-------------|
| t/h           | o-Xylene    | Calculated  |
| 1 3.0000e+000 | 2.2000e+001 | 2.0276e+001 |
| 2 6.0000e+000 | 3.9000e+001 | 4.2750e+001 |
| 3 9.0000e+000 | 5.6000e+001 | 5.7401e+001 |
| 4 1.2000e+001 | 7.2000e+001 | 6.6954e+001 |
| 5 2.4000e+001 | 8.0000e+001 | 8.1616e+001 |

**Fig. S9c** Evaluation of rate constant from the non-linear fit of % conversion of o-xylene with time in h using equation  $y = A*(1-\exp(-kt))$ .
